# Supplementary material for: A retrospective study of the pre-eruptive unrest on El Hierro (Canary Islands): implications of seismicity and deformation in the short-term volcanic hazard assessment
Source: Copernicus journal article supplement (doi:10.5194/nhess-18-1759-2018), 2018-06-22

FIGURE S1 - Susceptibility maps and seismicity location during the evolution of the unrest period

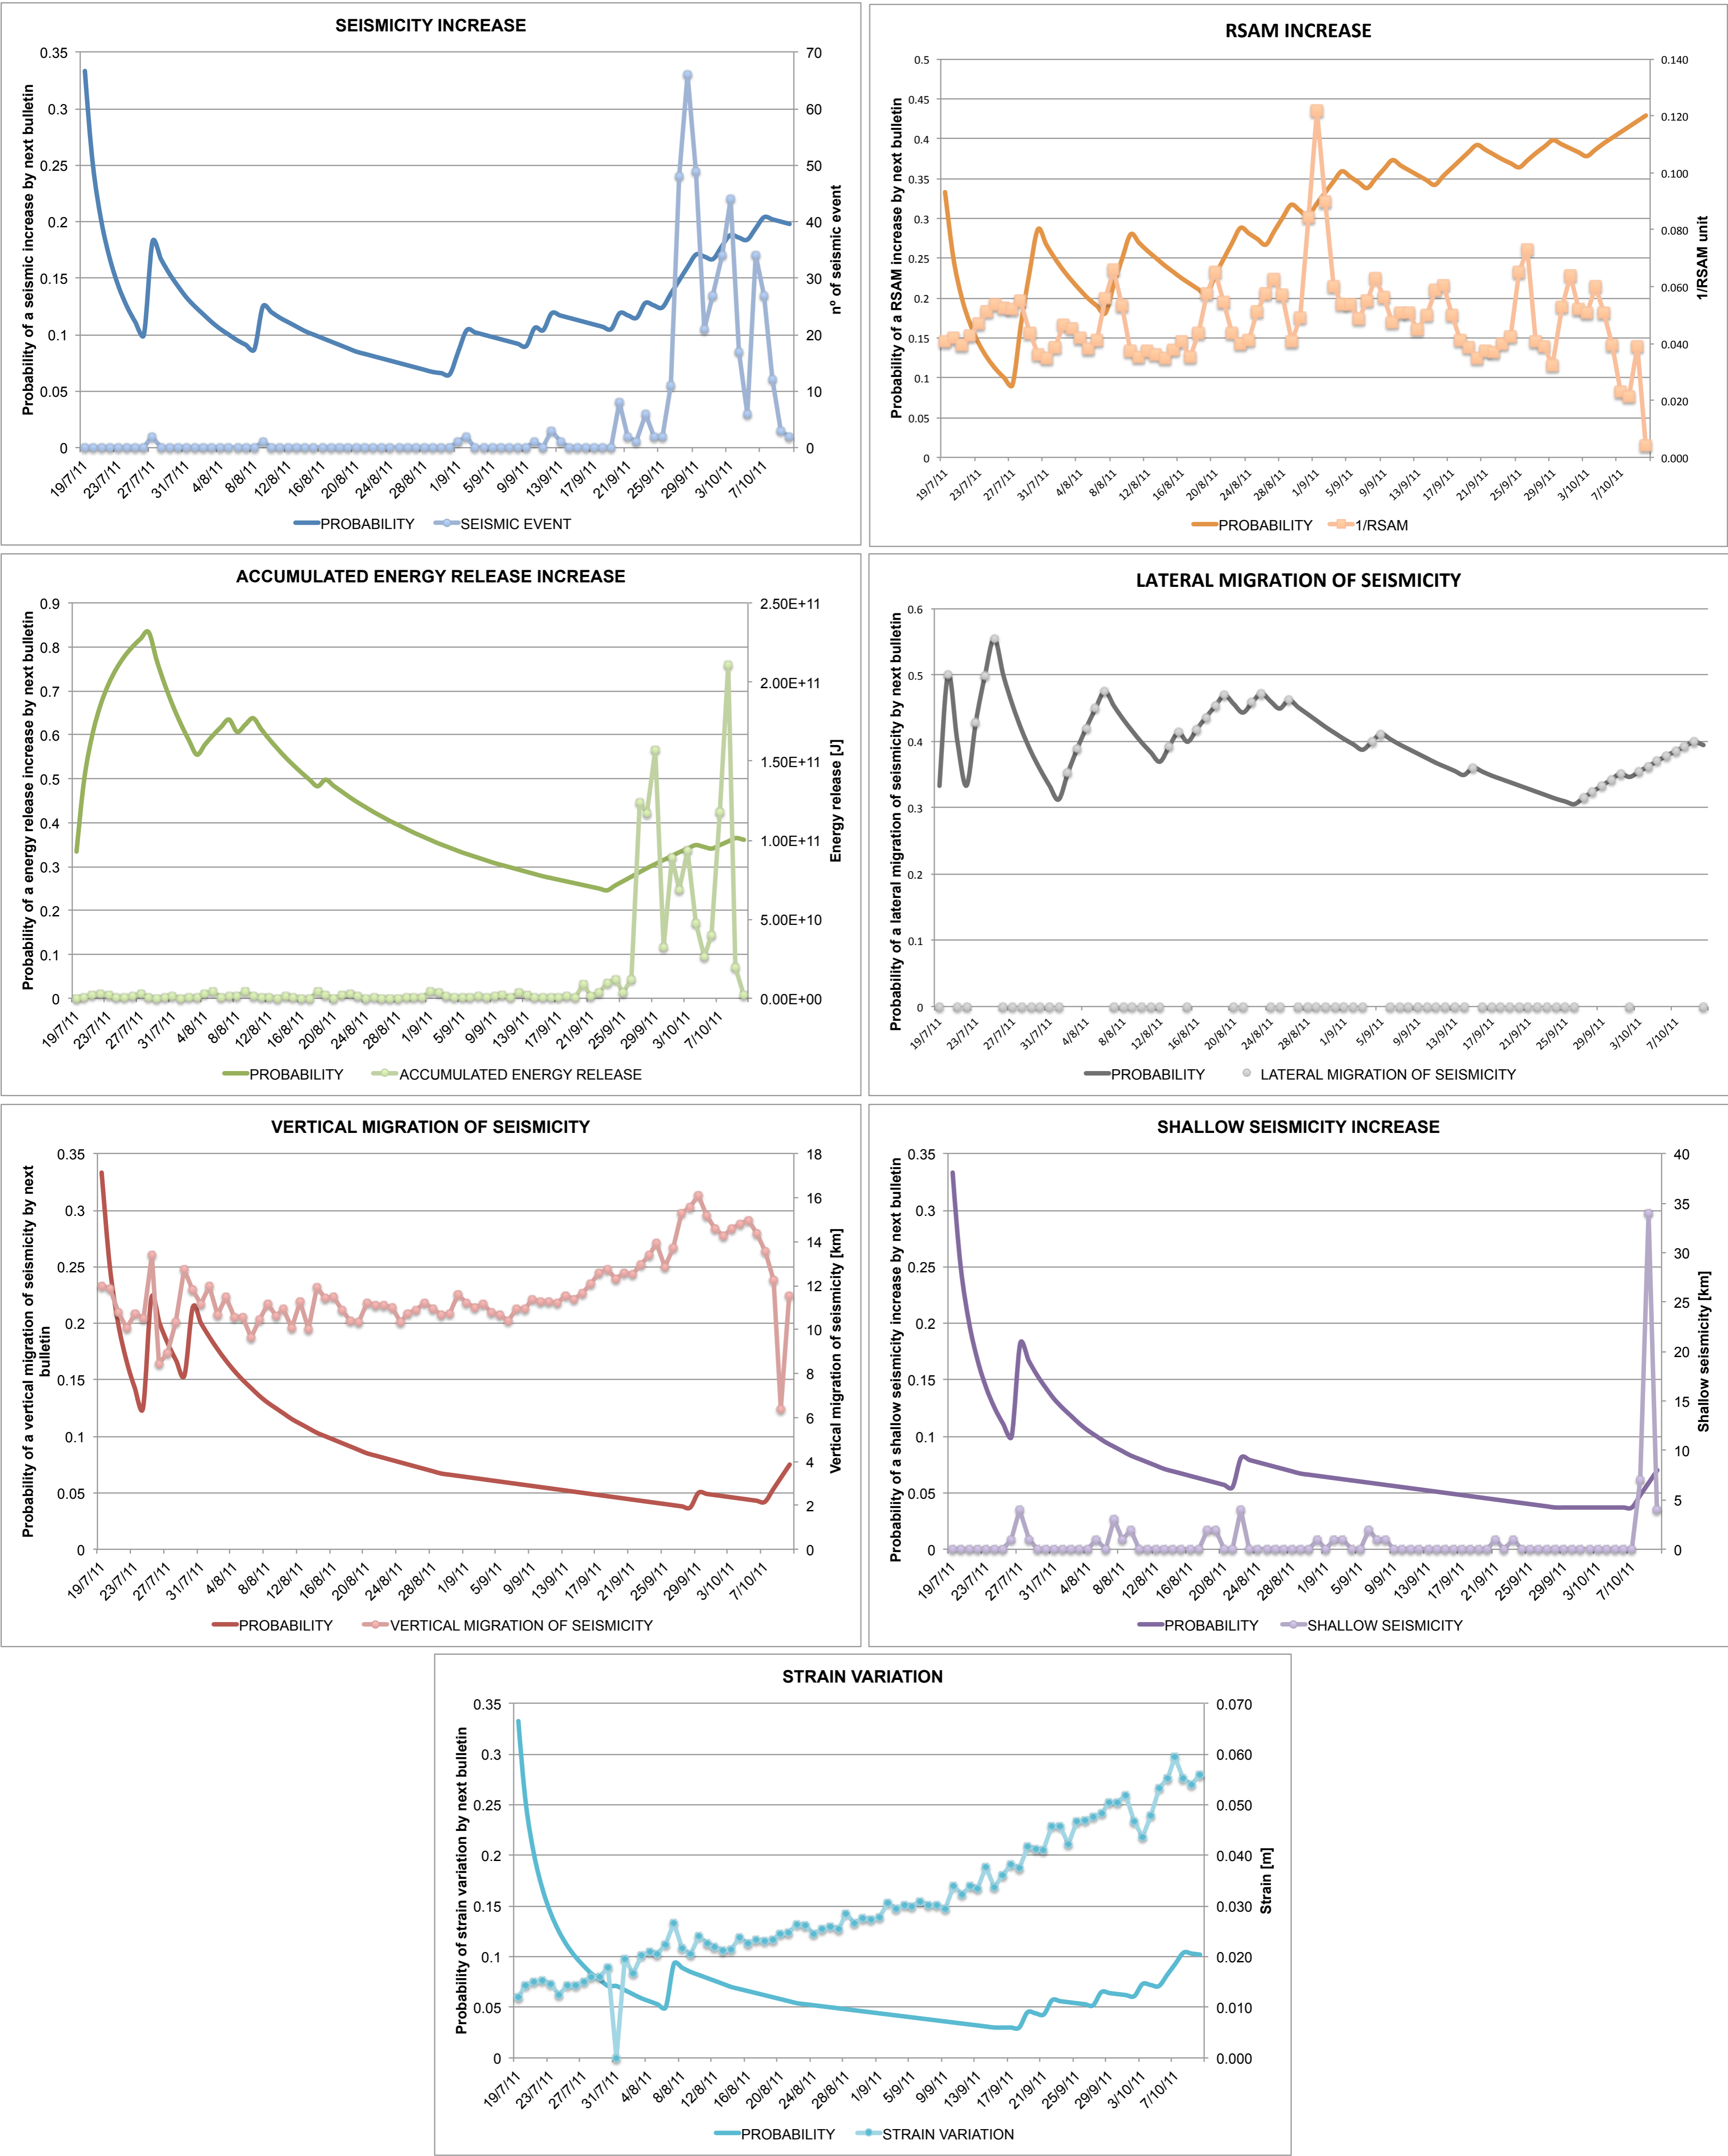

Supplement: Supplementary file 1 [file nhess-18-1759-2018-supplement.zip]
