# Supplementary material for: A retrospective study of the pre-eruptive unrest on El Hierro (Canary Islands): implications of seismicity and deformation in the short-term volcanic hazard assessment
Source: Copernicus journal article supplement (doi:10.5194/nhess-18-1759-2018), 2018-06-22
Supplement: Supplementary file 2 [file nhess-18-1759-2018-supplement.zip]

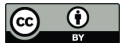

## *Supplement of*

# **A retrospective study of the pre-eruptive unrest on El Hierro (Canary Islands): implications of seismicity and deformation in the short-term volcanic hazard assessment**

**Stefania Bartolini et al.**

*Correspondence to:* Stefania Bartolini ([sbartolini.1984@gmail.com](mailto:sbartolini.1984@gmail.com))

- [nhess-18-1759-2018-supplement-title-page.pdf](#)
- [FigureS1.pdf](#)
- [Supplementary\\_Material\\_captions.docx](#)
- [ms01\\_def.wmv](#)

The copyright of individual parts of the supplement might differ from the CC BY 4.0 License.
